# Supplementary material for: Design and Validation of the INCUE Questionnaire: Assessment of Primary Healthcare Nurses’ Basic Training Needs in Palliative Care
Source: MDPI journal article supplement (doi:10.3390/ijerph182010995), 2021-10-19
Supplement: s1 [file s1]

**Table S1.** The INCUE questionnaire to assess primary and home healthcare nurses' basic training needs in palliative care.

| Part 1                                                                                                                             |                         | Part 2                                                                                                                                                    |                  |
|------------------------------------------------------------------------------------------------------------------------------------|-------------------------|-----------------------------------------------------------------------------------------------------------------------------------------------------------|------------------|
| Based on your knowledge of Palliative Care, answer the following questions:                                                        | Response options        | Answer the following questions based on your clinical practice:                                                                                           | Response options |
| Area 1: Principles of palliative care                                                                                              |                         |                                                                                                                                                           |                  |
| 1. According to the philosophy of Palliative Care, the patient and relatives form the unit to be treated.                          | Yes                     | 24. Do you work as part of a team in your healthcare activity?                                                                                            | Never            |
| 2. Palliative Care considers death as a natural process.                                                                           |                         | 25. Do you assess the needs of family members?                                                                                                            | Rarely           |
| 3. Palliative Care should be provided only to people with a life expectancy of less than 6 months.                                 | No                      | 26. Do you intervene in the needs of family members?                                                                                                      | Sometimes        |
| 4. Palliative Care is performed only by Palliative Care Units.                                                                     | Do not know / no answer | 27. Do you use an instrument to identify patients with palliative needs?                                                                                  | Often            |
|                                                                                                                                    |                         | 28. Do you provide spiritual guidance as part of the care of the palliative patients you attend to?                                                       | Always           |
|                                                                                                                                    |                         | 29.Do you consider the quality of life of palliative patients?                                                                                            |                  |
| Area 2: Symptom management and specific care plans                                                                                 |                         |                                                                                                                                                           |                  |
| 5. The visual analog scale (VAS) scale is used to measure pain intensity.                                                          | Yes                     | 30. Do you use some sort of assessment scale in your daily work?                                                                                          | Never            |
| 6. Oral administration of morphine is ineffective.                                                                                 |                         | 31. Do you perform or teach relatives mouth-care of dependent patients, with palliative sedation or short-term life prognosis?                            | Rarely           |
| 7. Pain is the same as suffering.                                                                                                  | No                      | 32. After home administration of a prescribed pain control drug, do you assess its effectiveness?                                                         | Sometimes        |
| 8. Palliative sedation is indicated when there are one or more refractory symptoms.                                                | Do not know / no answer | 33. Do you teach relatives how to prepare and administer medication subcutaneously?                                                                       | Often            |
| 9. The NECPAL is an instrument used to identify people with palliative care needs.                                                 |                         | 34. Do you employ non-pharmacological measures to assist in symptom control?                                                                              | Always           |
|                                                                                                                                    |                         | 35. Do you perform periodic follow-up according to the needs of people in palliative situation?                                                           |                  |
| Area 3: Coping with loss and death                                                                                                 |                         |                                                                                                                                                           |                  |
| 10. Anger is one of the phases of adapting to loss.                                                                                | Yes                     | 36. Do you identify the phases of coping with the disease of a palliative patient?                                                                        | Never            |
| 11. Palliative Care ends with the death of the patient.                                                                            |                         | 37. Do you encourage relatives express their emotions after the death of the patient?                                                                     | Rarely           |
| 12. Patients may experience grief.                                                                                                 | No                      | 38. Do you carry out periodic follow-up of the relatives after the patient's death?                                                                       | Sometimes        |
| 13. Complicated grief issues require referral to a Mental Health Unit.                                                             | Do not know / no answer | 39. Do you evaluate the mourner's support network?                                                                                                        | Often            |
| 14. There are scales to rate risk factors associated to complicated grief.                                                         |                         | 40. Do you use instruments to assess the risk of complicated grief?                                                                                       | Always           |
|                                                                                                                                    |                         | 41. Do you refer people you consider at risk of complicated grief to psychology / psychiatry units?                                                       |                  |
| Area 4: Communication skills                                                                                                       |                         |                                                                                                                                                           |                  |
| 15. When listening, we should keep an upright posture with our arms folded.                                                        | Yes                     | 42. Do you intervene in situations where the patient expresses discomfort or anger?                                                                       | Never            |
| 16. For suitable communication, we should remain at the foot of the patient's bed.                                                 |                         | 43. Do you explain the care to be administered to patients previous to their entering a state of palliative sedation or decreased level of consciousness? | Rarely           |
| 17. Patient suffering can produce compassion fatigue in professionals.                                                             | No                      | 44. Do you pay attention to the patient's nonverbal language in your daily work?                                                                          | Sometimes        |
| 18. During active listening, you should offer simple solutions, talk about yourself and minimize feelings.                         | Do not know / no answer | 45. Do you place yourself at the same height as the patient when conducting the interview for evaluation?                                                 | Often            |
|                                                                                                                                    |                         | 46. Do you explore the patient's concerns and feelings?                                                                                                   | Always           |
|                                                                                                                                    |                         | 47. Do you identify the needs of relatives?                                                                                                               |                  |
| Area 5: Ethical and legal issues                                                                                                   |                         |                                                                                                                                                           |                  |
| 19. We must respect the patient's wishes, even though we consider there are better therapeutic options for him/her.                | Yes                     | 48. Do you tailor patient care to their preferences?                                                                                                      | Never            |
| 20. The wishes of the patient must prevail over those of their relatives.                                                          |                         | 49. Do you involve the patient and their relatives in decision-making?                                                                                    | Rarely           |
| 21. There is a national register of advance directives or living will.                                                             | No                      | 50. Do you inform palliative patients that there is an advance directives or living will?                                                                 | Sometimes        |
| 22. Advance directives may be revoked.                                                                                             | Do not know / no answer | 51. Do you respect the patient's decisions, even if they are considered inappropriate?                                                                    | Often            |
| 23. Sedation may be applied to a patient in full use of his/her mental faculties without his/her consent in the last days of life. |                         | 52. Do you participate in decision-making?                                                                                                                | Always           |
|                                                                                                                                    |                         | 53. Do you take into account the cultural characteristics of the person and/or family, when administering care?                                           |                  |
